# Supplementary material for: SELENOP rs3877899 Variant Affects the Risk of Developing Advanced Stages of Retinopathy of Prematurity (ROP)
Source: MDPI journal article supplement (doi:10.3390/ijms24087570), 2023-04-20
Supplement: s1 [file s1]

**Supplemental Table S1.** Distribution of gene polymorphisms according to ROP (retinopathy of prematurity) presence, severity, and treatment outcome.

| Genotype                     | Incidence and Outcome of ROP |                                                 |                                              | Dose of allele<br>$\beta$ , $p$ for trend<br>I/II/III | ROP Requiring Treatment                     |                                               | Dose of allele<br>$p$<br>IIIa vs. IIIb |
|------------------------------|------------------------------|-------------------------------------------------|----------------------------------------------|-------------------------------------------------------|---------------------------------------------|-----------------------------------------------|----------------------------------------|
|                              | I<br>No ROP<br>N=52          | II<br>ROP Not<br>Requiring<br>Treatment<br>N=55 | III<br>ROP<br>Requiring<br>Treatment<br>N=66 |                                                       | IIIa<br>ROP Treated<br>Successfully<br>N=47 | IIIb<br>ROP Treated<br>Unsuccessfully<br>N=19 |                                        |
| <i>SELENOP</i> rs3877899G>A  |                              |                                                 |                                              |                                                       |                                             |                                               |                                        |
| GG                           | 32 (61.5)                    | 32 (58.2)                                       | 32 (48.5)                                    | <b>0.150;<br/>&lt;0.050</b>                           | 24 (51.1)                                   | 8 (42.1)                                      | 0.517                                  |
| GA                           | 19 (36.5)                    | 18 (32.7)                                       | 26 (39.4)                                    |                                                       | 19 (40.4)                                   | 7 (36.8)                                      |                                        |
| AA                           | 1 (1.9)                      | 5 (9.1)                                         | 8 (12.1)                                     |                                                       | 4 (8.5)                                     | 4 (21.1)                                      |                                        |
| MAF                          | <b>0.202<sup>a,b</sup></b>   | 0.255                                           | <b>0.318<sup>a</sup></b>                     |                                                       | 0.287                                       | <b>0.395<sup>b</sup></b>                      |                                        |
| <i>SELENOP</i> rs7579G>A     |                              |                                                 |                                              |                                                       |                                             |                                               |                                        |
| GG                           | 22 (43.1)                    | 29 (52.7)                                       | 38 (57.6)                                    | -0.119;<br>0.121                                      | 23 (48.9)                                   | 15 (78.9)                                     | 0.069                                  |
| GA                           | 25 (49.0)                    | 23 (41.8)                                       | 25 (37.9)                                    |                                                       | 22 (46.8)                                   | 3 (15.8)                                      |                                        |
| AA                           | 4 (7.8)                      | 3 (5.5)                                         | 3 (4.5)                                      |                                                       | 2 (4.3)                                     | 1 (5.3)                                       |                                        |
| MAF                          | <b>0.324<sup>c</sup></b>     | 0.264                                           | 0.235                                        |                                                       | 0.277                                       | <b>0.132<sup>c</sup></b>                      |                                        |
| <i>SELENOS</i> rs34713741C>T |                              |                                                 |                                              |                                                       |                                             |                                               |                                        |
| CC                           | 29 (56.9)                    | 29 (52.7)                                       | 35 (53.0)                                    | -0.033;<br>0.659                                      | 27 (57.4)                                   | 8 (42.1)                                      | 0.398                                  |
| CT                           | 14 (27.5)                    | 25 (45.5)                                       | 27 (40.9)                                    |                                                       | 17 (36.2)                                   | 10 (52.6)                                     |                                        |
| TT                           | 8 (15.7)                     | 1 (1.8)                                         | 4 (6.1)                                      |                                                       | 3 (6.4)                                     | 1 (5.3)                                       |                                        |
| MAF                          | 0.294                        | 0.245                                           | 0.265                                        |                                                       | 0.245                                       | 0.316                                         |                                        |
| <i>GPX4</i> rs713041C>T      |                              |                                                 |                                              |                                                       |                                             |                                               |                                        |
| CC                           | 23 (44.2)                    | 21 (38.2)                                       | 25 (37.9)                                    | 0.011;<br>0.883                                       | 15 (31.9)                                   | 10 (52.6)                                     | 0.261                                  |
| CT                           | 18 (34.6)                    | 26 (47.3)                                       | 30 (45.5)                                    |                                                       | 24 (51.1)                                   | 6 (31.6)                                      |                                        |
| TT                           | 11 (21.2)                    | 8 (14.5)                                        | 11 (16.7)                                    |                                                       | 8 (17.0)                                    | 3 (15.8)                                      |                                        |
| MAF                          | 0.385                        | 0.382                                           | 0.394                                        |                                                       | 0.426                                       | 0.316                                         |                                        |

Statistical analysis: a, b -*SELENOP* rs3877899: a: I vs. III: A allele: OR=1.8 (95%C.I.: 1.0-3.4),  $p=0.045$ ; AA genotype (recessive): OR=7.0 (95%C.I.: 1.0-58.2),  $p=0.038$ ; b: I vs. IIIb: A allele: OR=2.6 (95%C.I.: 1.1-5.8),  $p=0.019$ ; AA genotype (recessive): OR=13.6 (95%C.I.: 1.4-131.1),  $p=0.005$ ; c: *SELENOP* rs7579A I vs. IIIb: A allele: OR=0.32 (95%C.I.: 0.11-0.89),  $p=0.023$ ; AA+GA genotype (dominant): OR=0.20 (95%C.I.: 0.06-0.70),  $p=0.008$ .

**Supplemental Table S2.** Distribution of gene polymorphisms according to the presence of complications of prematurity: RDS, IVH, PDA, NEC, BPD, extremely low gestational age, and extremely low birth weight.

| Genotype                     | No RDS<br>N=81 | RDS<br>N=101 | No IVH<br>N=61 | IVH<br>N=121 | No PDA<br>N=128 | PDA<br>N=54 | No NEC<br>N=134 | NEC<br>N=47 | No BPD<br>N=100 | BPD<br>N=82 | ≥28 wk.<br>n=102         | <28 wk.<br>n=82          | ≥1000 g<br>n=104 | <1000 g<br>n=80 |
|------------------------------|----------------|--------------|----------------|--------------|-----------------|-------------|-----------------|-------------|-----------------|-------------|--------------------------|--------------------------|------------------|-----------------|
| <i>SELENOP</i> rs3877899G>A  |                |              |                |              |                 |             |                 |             |                 |             |                          |                          |                  |                 |
| GG                           | 40 (49.4)      | 61 (60.4)    | 31 (50.8)      | 70 (57.9)    | 75 (58.6)       | 26 (48.1)   | 76 (56.7)       | 24 (51.1)   | 54 (54.0)       | 47 (57.3)   | 64 (62.7)                | 39 (47.6)                | 60 (57.7)        | 43 (53.8)       |
| GA                           | 33 (40.7)      | 34 (33.7)    | 25 (41.0)      | 42 (34.7)    | 41 (32.0)       | 26 (48.1)   | 51 (38.1)       | 16 (34.0)   | 40 (40.0)       | 27 (32.9)   | <b>33 (32.4)</b>         | <b>34 (41.5)</b>         | 38 (36.5)        | 29 (36.3)       |
| AA                           | 8 (9.9)        | 6 (5.9)      | 5 (8.2)        | 9 (7.4)      | 12 (9.4)        | 2 (3.7)     | 7 (5.2)         | 7 (14.9)    | 6 (6.0)         | 8 (9.8)     | <b>5 (4.9)</b>           | <b>9 (11.0)</b>          | 6 (5.8)          | 8 (10.0)        |
| MAF                          | 0.302          | 0.228        | 0.287          | 0.248        | 0.254           | 0.278       | 0.243           | 0.319       | 0.260           | 0.262       | <b>0.211<sup>a</sup></b> | <b>0.317<sup>a</sup></b> | 0.240            | 0.281           |
| <i>SELENOP</i> rs7579G>A     |                |              |                |              |                 |             |                 |             |                 |             |                          |                          |                  |                 |
| GG                           | 40 (49.4)      | 61 (60.4)    | 31 (50.8)      | 70 (57.9)    | 68 (53.1)       | 26 (49.1)   | 66 (49.3)       | 28 (60.9)   | 46 (46.0)       | 48 (59.3)   | 48 (47.1)                | 46 (56.8)                | 52 (50.5)        | 42 (52.5)       |
| GA                           | 33 (40.7)      | 34 (33.7)    | 25 (41.0)      | 42 (34.7)    | 53 (41.4)       | 24 (45.3)   | 60 (44.8)       | 16 (34.8)   | 48 (48.0)       | 29 (35.8)   | 46 (45.1)                | 32 (39.5)                | 46 (44.7)        | 32 (40.0)       |
| AA                           | 8 (9.9)        | 6 (5.9)      | 5 (8.2)        | 9 (7.4)      | 7 (5.5)         | 3 (5.7)     | 8 (6.0)         | 2 (4.3)     | 6 (6.0)         | 4 (4.9)     | 8 (7.8)                  | 3 (3.7)                  | 5 (4.9)          | 6 (7.5)         |
| MAF                          | 0.244          | 0.287        | 0.275          | 0.264        | 0.262           | 0.283       | 0.284           | 0.217       | 0.300           | 0.228       | 0.304                    | 0.235                    | 0.272            | 0.275           |
| <i>SELENOS</i> rs34713741C>T |                |              |                |              |                 |             |                 |             |                 |             |                          |                          |                  |                 |
| CC                           | 40 (50.0)      | 57 (56.4)    | 32 (53.3)      | 65 (53.7)    | 66 (51.6)       | 31 (58.5)   | 71 (53.0)       | 26 (56.5)   | 48 (48.0)       | 49 (60.5)   | 53 (52.0)                | 44 (54.3)                | 51 (49.5)        | 46 (57.5)       |
| CT                           | 37 (46.3)      | 34 (33.7)    | 24 (40.0)      | 47 (38.8)    | 51 (39.8)       | 20 (37.7)   | 53 (39.6)       | 17 (37.0)   | 42 (42.0)       | 29 (35.8)   | 37 (36.3)                | 34 (42.0)                | 42 (40.8)        | 29 (36.3)       |
| TT                           | 3 (3.8)        | 10 (9.9)     | 4 (6.7)        | 9 (7.4)      | 11 (8.6)        | 2 (3.8)     | 10 (7.5)        | 3 (6.5)     | 10 (10.0)       | 3 (3.7)     | 12 (11.8)                | 3 (3.7)                  | 10 (9.7)         | 5 (6.3)         |
| MAF                          | 0.269          | 0.267        | 0.267          | 0.269        | 0.285           | 0.226       | 0.272           | 0.250       | 0.310           | 0.216       | 0.299                    | 0.247                    | 0.301            | 0.244           |
| <i>GPX4</i> rs713041C>T      |                |              |                |              |                 |             |                 |             |                 |             |                          |                          |                  |                 |
| CC                           | 30 (37.0)      | 42 (41.6)    | 27 (44.3)      | 45 (37.2)    | 53 (41.4)       | 19 (35.2)   | 55 (41.0)       | 16 (34.0)   | 42 (42.0)       | 30 (36.6)   | 43 (42.2)                | 31 (37.8)                | 43 (41.3)        | 31 (38.8)       |
| CT                           | 36 (44.4)      | 44 (43.6)    | 25 (41.0)      | 55 (45.5)    | 55 (43.0)       | 25 (46.3)   | 59 (44.0)       | 21 (44.7)   | 44 (44.0)       | 36 (43.9)   | 43 (42.2)                | 37 (45.1)                | 47 (45.2)        | 33 (41.3)       |
| TT                           | 15 (18.5)      | 15 (14.9)    | 9 (14.8)       | 21 (17.4)    | 20 (15.6)       | 10 (18.5)   | 20 (14.9)       | 10 (21.3)   | 14 (14.0)       | 16 (19.5)   | 16 (15.7)                | 14 (17.1)                | 14 (13.5)        | 16 (20.0)       |
| MAF                          | 0.407          | 0.366        | 0.352          | 0.401        | 0.371           | 0.417       | 0.369           | 0.436       | 0.360           | 0.415       | 0.368                    | 0.396                    | 0.361            | 0.406           |

Abbreviations and symbols: BPD-bronchopulmonary dysplasia; IVH-intraventricular hemorrhage; PDA-patent ductus arteriosus; RDS-respiratory distress syndrome; ROP-retinopathy of prematurity, NEC-necrotizing enterocolitis. Statistical analysis: a - *SELENOP* rs3877899A allele: OR=1.7 (95%C.I. 1.1-2.8),  $p=0.02$ ; carriers of the rs3877899A allele (AA+GA genotypes): OR=1.9 (95%C.I.: 1.0-3.4),  $p=0.04$ .
